# Supplementary material for: Layered nickel metal–organic framework for high performance alkaline battery-supercapacitor hybrid devices
Source: Royal Society of Chemistry journal article supplement (doi:10.1039/c6ta05384j), 2016-01-01
Supplement: c6ta05384j1.pdf [file c6ta05384j1.pdf]

## Supporting information

### **Layered Nickel metal-organic framework for high performance alkaline battery-supercapacitor hybrid deceives**

Yang Jiao, Jian Pei\*, Chunshuang Yan, Dahong Chen, Yongyuan Hu, Gang Chen\*

*MIT Key Laboratory of Critical Materials Technology for New Energy Conversion  
and Storage, School of Chemistry and Chemical Engineering, Harbin Institute of  
Technology, Harbin 150001, People's Republic of China*

*To whom correspondences should be addressed: E-mail: [peijian008@163.com](mailto:peijian008@163.com) and  
[gchen@hit.edu.cn](mailto:gchen@hit.edu.cn)*

**Table S1** Comparison of specific capacity among the previous reports and our works using the three-electrode system.

| Electrode materials                       | Electrolyte                                              | Current density (A·g <sup>-1</sup> ) | Specific capacity (mAh·g <sup>-1</sup> ) | Ref.     |
|-------------------------------------------|----------------------------------------------------------|--------------------------------------|------------------------------------------|----------|
| CoS nanowire arrays                       | 2 M KOH                                                  | 2                                    | 129                                      | S1       |
| Co <sub>3</sub> O <sub>4</sub> nanosheets | 6 M KOH                                                  | 1                                    | 20.2                                     | S2       |
| MoS <sub>2</sub> nanosheets/<br>Graphene  | 1 M Na <sub>2</sub> SO <sub>4</sub>                      | 0.1                                  | 75                                       | S3       |
| NiO Nanofibers                            | 6 M KOH                                                  | 2                                    | 25.3                                     | S4       |
| Porous Graphene Framework                 | 3 M KOH                                                  | 0.2                                  | 66                                       | S5       |
| Ni-MOF                                    | 3 M KOH                                                  | 1                                    | 123                                      | Our Work |
| Ni-MOF                                    | 3 M KOH<br>+ 0.1 M<br>K <sub>4</sub> Fe(CN) <sub>6</sub> | 1                                    | 175                                      | Our Work |

**Table S2** Various performance parameters for our ABSHD in 3 M KOH electrolyte.

| Current density (A·g <sup>-1</sup> ) | Discharge time (s) | Specific capacity (mAh·g <sup>-1</sup> ) | Energy density (W·h·kg <sup>-1</sup> ) | Power density (W·kg <sup>-1</sup> ) |
|--------------------------------------|--------------------|------------------------------------------|----------------------------------------|-------------------------------------|
| 1                                    | 277.2              | 77                                       | 53.9                                   | 700                                 |
| 2                                    | 113.6              | 63.1                                     | 44.2                                   | 1400                                |
| 5                                    | 42.5               | 59                                       | 41.4                                   | 3500                                |
| 10                                   | 20.4               | 56.7                                     | 39.7                                   | 7000                                |

**Table S3** Various performance parameters for our ABSHD in 3 M KOH and 0.1M K<sub>4</sub>Fe(CN)<sub>6</sub> electrolyte.

| Current density (A·g <sup>-1</sup> ) | Discharge time(s) | Specific capacity (mAh·g <sup>-1</sup> ) | Energy density (W·h·kg <sup>-1</sup> ) | Power density (W·kg <sup>-1</sup> ) |
|--------------------------------------|-------------------|------------------------------------------|----------------------------------------|-------------------------------------|
| 1                                    | 348               | 96.7                                     | 67.7                                   | 700                                 |
| 2                                    | 163.3             | 90.7                                     | 63.5                                   | 1400                                |
| 5                                    | 62                | 85.5                                     | 60.3                                   | 3500                                |
| 10                                   | 28.7              | 79.8                                     | 55.8                                   | 7000                                |

**Table S4** Comparison of electrochemistry performance of electrochemical energy stored devices fabricated in our work with others reported.

| Materials                                           | Counter   | Electrolyte                                        | Potential Window (V) | Energy Density (W·h·Kg <sup>-1</sup> ) | Power Density (W·Kg <sup>-1</sup> ) | Ref.     |
|-----------------------------------------------------|-----------|----------------------------------------------------|----------------------|----------------------------------------|-------------------------------------|----------|
| MnO <sub>2</sub>                                    | AC        | 0.5 M Na <sub>2</sub> SO <sub>4</sub>              | 1.8                  | 10.4                                   | 14700                               | S6       |
| Co <sub>3</sub> O <sub>4</sub> @Ni(OH) <sub>2</sub> | RGO       | 6 M KOH                                            | 1.6                  | 18.54                                  | 1860                                | S7       |
| Ni(OH) <sub>2</sub> @Ni foam                        | a-MEGO    | 6 M KOH                                            | 1.8                  | 13.4                                   | 85000                               | S8       |
| Co(OH) <sub>2</sub> nanorods                        | GO        | 1 M KOH                                            | 1.2                  | 11.94                                  | 2540                                | S9       |
| MnO <sub>2</sub>                                    | AC        | 0.5 M K <sub>2</sub> SO <sub>4</sub>               | 1.8                  | 28.4                                   | 150                                 | S10      |
| Ni-MOF                                              | CNTs-COOH | 3 M KOH                                            | 1.4                  | 39.7                                   | 7000                                | Our Work |
| Ni-MOF                                              | CNTs-COOH | 3 M KOH + 0.1 M K <sub>4</sub> Fe(CN) <sub>6</sub> | 1.4                  | 55.8                                   | 7000                                | Our Work |

AC: activated carbon

RGO: graphene

a-MEGO: activated microwave exfoliated graphite oxide

GO: graphene oxide

CNTs-COOH: carbon nanotubes functionized with carboxylic group

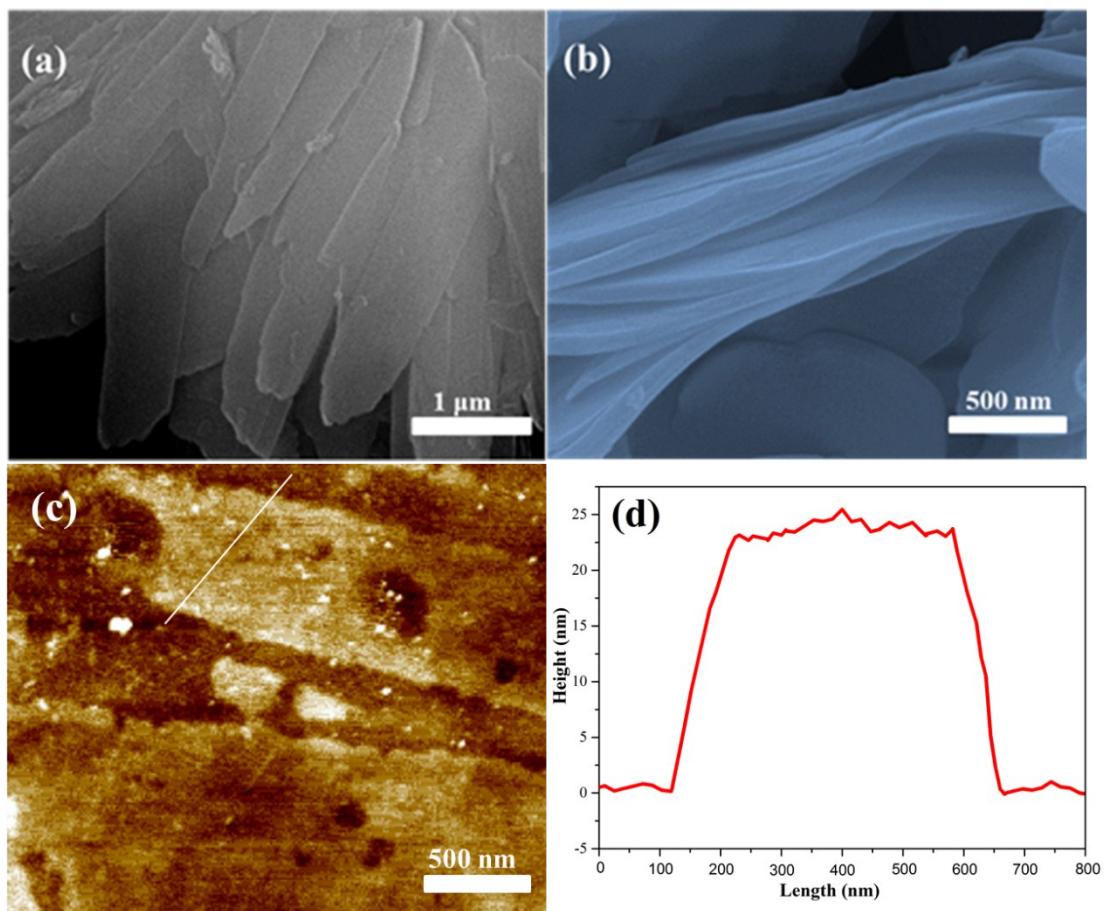

**Figure S1** (a, b) SEM images of Ni-MOF. (c) AFM image of the layered Ni-MOF nanosheets and (d) corresponding height profile.

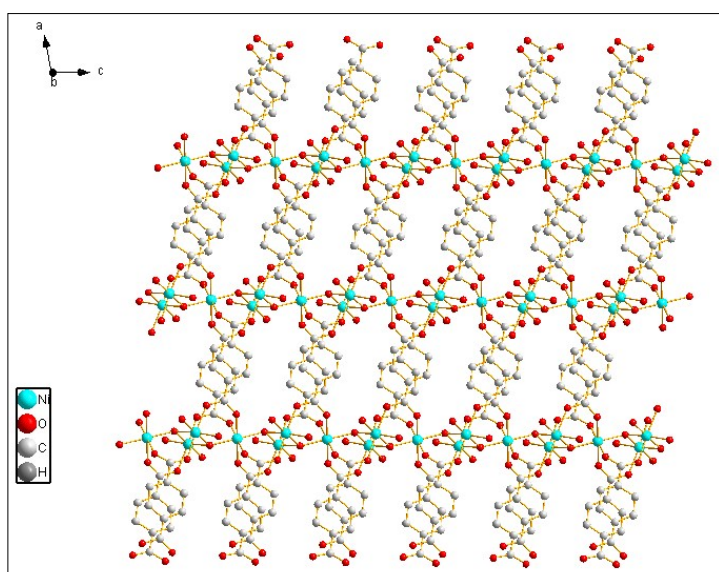

**Figure S2** View of the structure of Ni-MOF along the b axis.

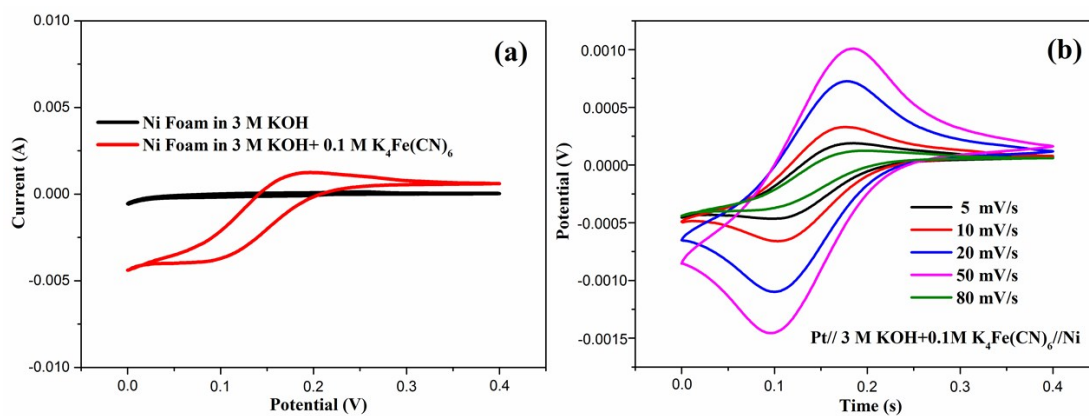

**Figure S3** (a) Cyclic voltammograms of Ni foam and Ni-MOF in 3 M KOH + 0.1 M K<sub>4</sub>Fe(CN)<sub>6</sub> at a scan rate of 5 mV s<sup>-1</sup>. (b) CV curves of bare Ni foam as working electrode at different scan rates.

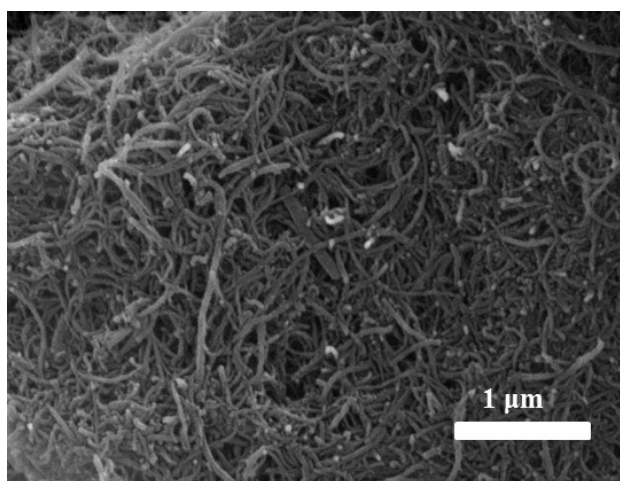

**Figure S4** SEM image of the CNTs-COOH.

### Preparation of negative electrode and its electrochemical performances:

The negative electrode for the alkaline battery-supercapacitor hybrid device (ABSHD) was prepared by mixing Carbon nanotubes functionalized with carboxylic group (CNTs-COOH), carbon black, polyvinylene difluoride (PVDF) (in the weight ratio of 8:1:1) together using NMP as solvent. The mixture was coated onto the cleaned Ni foam (1 cm<sup>2</sup>) and was kept for drying at 80 °C overnight. Then the electrode was used as the working electrode. 3 M KOH solution, saturated calomel electrode (SCE) and platinum foil were used as the electrolytes, reference and counter electrodes, respectively. The weight of active material is about 4 mg. The specific capacitance of CNTs-COOH is 156.7 F g<sup>-1</sup> at the current density of 1 A g<sup>-1</sup>. Moreover, grapheme oxide (GO) was also used as another negative electrode for the ABSHD. The specific capacitance of GO is 91.6 F g<sup>-1</sup> at the current density of 1 A g<sup>-1</sup>. The Ni-MOF//GO ABSHD in 3 M KOH exhibit energy density of 33 W h kg<sup>-1</sup> at a power density of 7000 W kg<sup>-1</sup>. This result indicated that the high electrochemical performance is independent with the negative electrode, and support the high electrochemical performance of Ni-MOF.

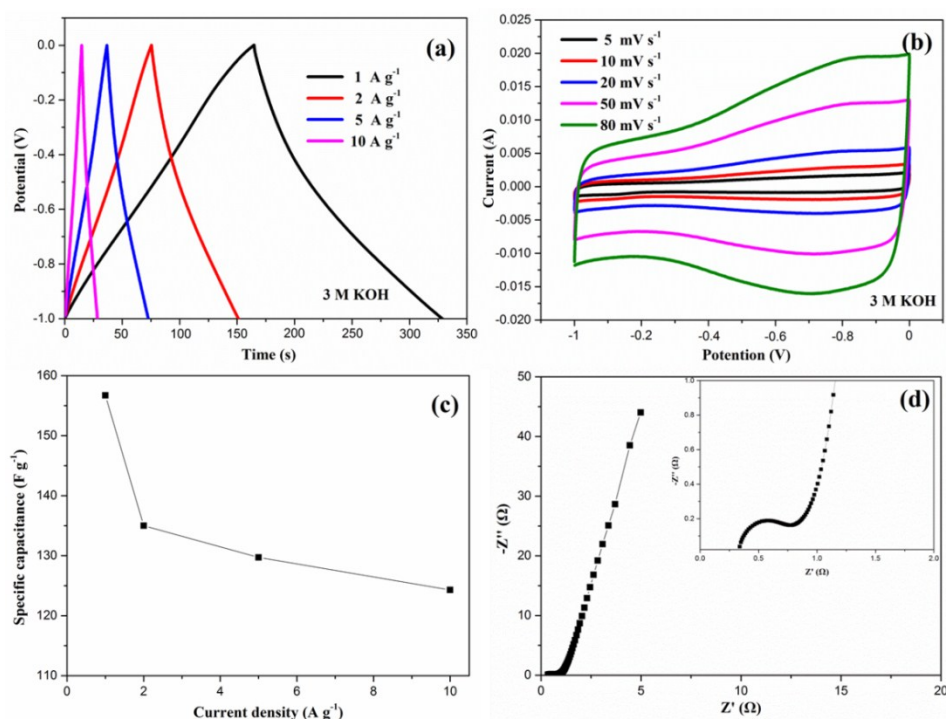

**Figure S5** (a) Charge and discharge curves of CNTs-COOH at different current densities ranged from 1 to 10 A g<sup>-1</sup>. (b) CV curves of CNTs-COOH at the scan rate between 5 and 80 mV s<sup>-1</sup>. (c) Specific capacity as a function of current density. (d) Nyquist plots of the CNTs-COOH

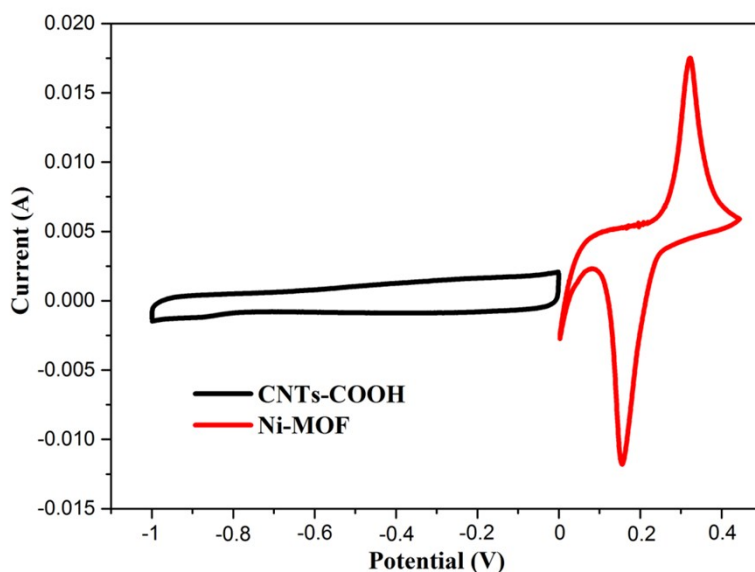

**Figure S6** CV curves of Ni-MOF and CNTs-COOH electrodes performed in a three-electrode cell in a 3 MKOH+0.1 M  $K_4Fe(CN)_6$  electrolyte at a scan rate of  $5 \text{ mV s}^{-1}$ .

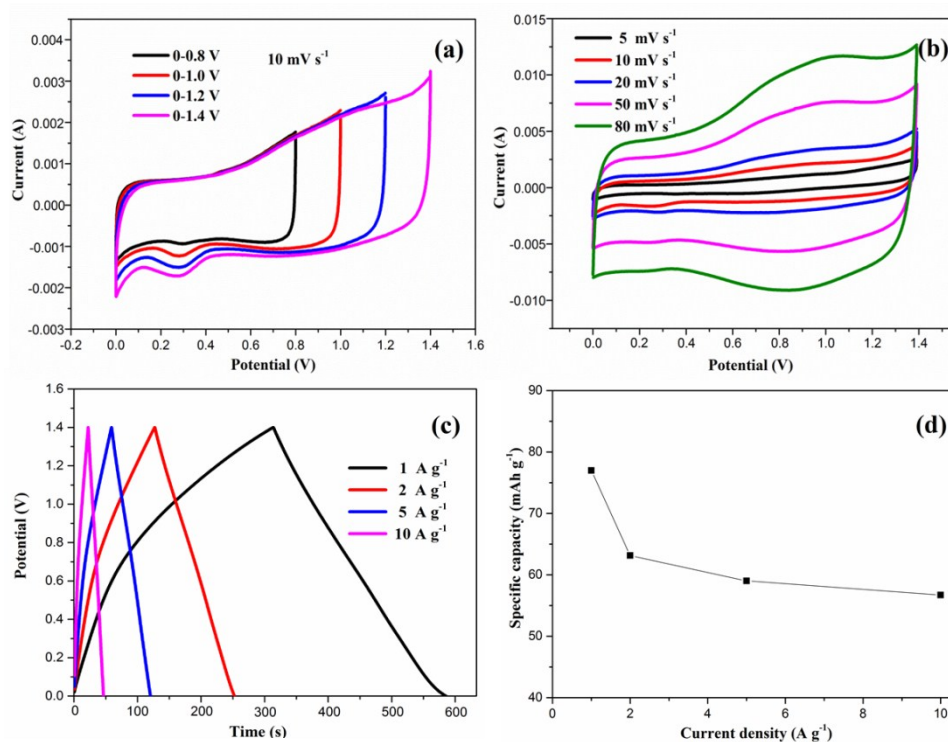

**Figure S7** (a) CV curves of the optimized Ni-MOF//CNTs-COOH ABSHD in 3 MKOH was collected at different potential windows at a scan rate of  $10 \text{ mV s}^{-1}$ . (b) CV curves of the optimized Ni-MOF//CNTs-COOH ABSHD in 3 MKOH collected at various scan rates. (c) Charge-discharge curves of optimized Ni-MOF//CNTs-COOH ABSHD in 3 M KOH collected at various current densities. (d) Plot of the current density against the specific capacity of Ni-MOF//CNTs-COOH ABSHD in 3 M KOH.

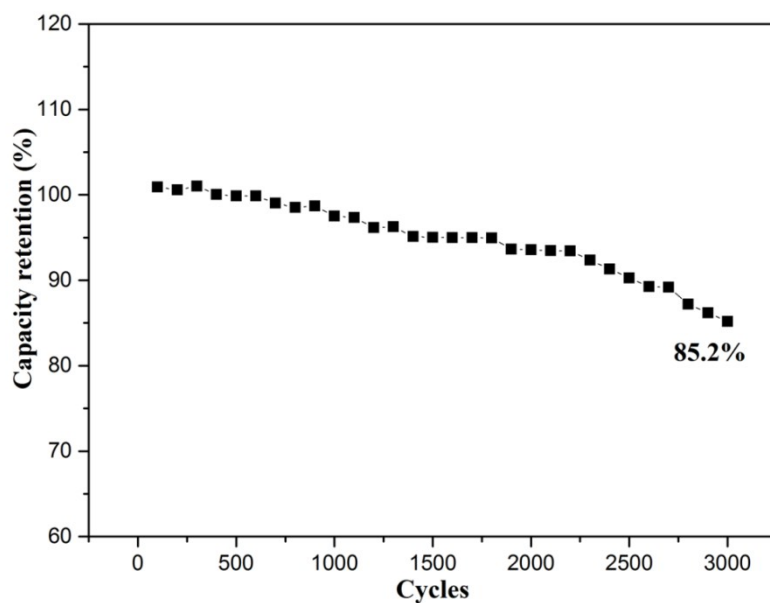

**Figure S8** Cycling performance of Ni-MOF//CNTs-COOH ABSHD at a discharge current density of 10 A g<sup>-1</sup> in 3 MKOH.

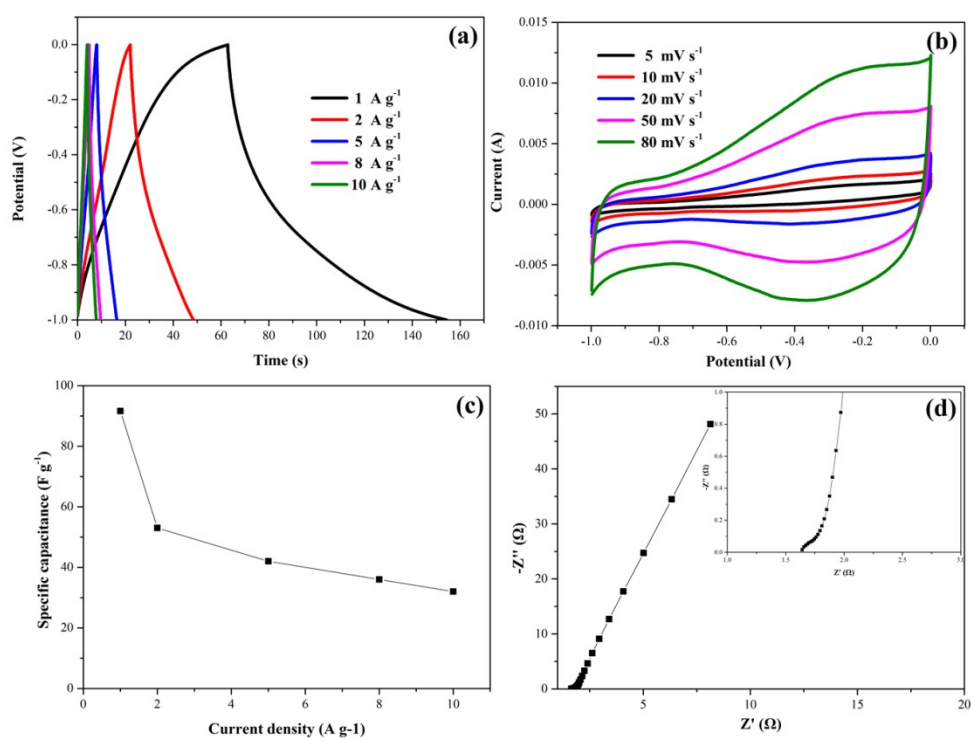

**Figure S9** (a) Charge and discharge curves of AC at different current densities ranged from 1 to 10 A g<sup>-1</sup>. (b) CV curves of AC at the scan rate between 5 and 80 mV s<sup>-1</sup>. (c) Specific capacity as a function of current density. (d) Nyquist plots of the AC.



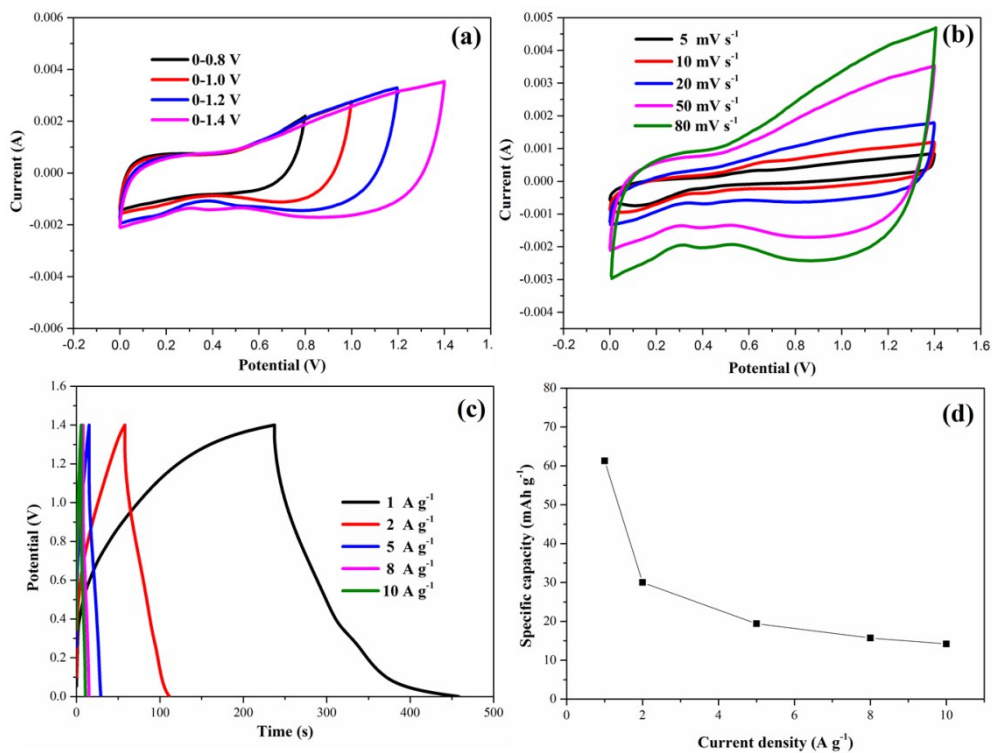

**Figure S10** (a) CV curves of the optimized Ni-MOF//AC ABSHD in 3 M KOH was collected at different potential windows at a scan rate of 10 mV s<sup>-1</sup>. (b) CV curves of the optimized Ni-MOF//AC ABSHD in 3 M KOH collected at various scan rates. (c) Charge–discharge curves of optimized Ni-MOF//AC ABSHD in 3 M KOH collected at various current densities. (d) Plot of the current density against the specific capacity of Ni-MOF//AC ABSHD in 3 M KOH.

- [S1] X.H. Xia, C. Zhu, J. Luo, Z. Zeng, C. Guan, C. Fan, Ng, H. Zhang and H.J. Fan, *Small* 10 (2014) 766-773.
- [S2] F. Zhang, L. Hao, L. Zhang, X. Zhang, *Int. J. Electrochem. Sci.* 6 (2011) 2943-2954.
- [S3] R. Thangappan, S. Kalaiselvam, A. Elayaperumal, R. Jayavel, M. Arivanandhan, R. Karthikeyan and Y. Hayakawa, *Dalton Trans.* 45 (2016) 2637-2646.
- [S4] M. Kolathodi, M. Palei and T.S. Natarajan, *J. Mater. Chem. A* 3 (2015) 7513-7522.
- [S5] K. Yuan, Y. Z. Xu, J. Uihlein, G. Bruncklaus, L. Shi, R. Heiderhoff, M.M. Que, M. Forster, T. Chassé, T. Pichler, T. Riedl, Y.W. Chen, U. Sche, *Adv. Mater.* 27 (2015) 6714-6721
- [S6] Y.T. Wang, A.H. Lu, H.L. Zhang, W.C. Li, *J. Phys. Chem. C* 115 (2011) 5413-5421.
- [S7] H.B. Li, M.H. Yu, F.X. Wang, P. Liu, Y. Liang, J. Xiao, C.X. Wang, Y. X. Tong, G.W. Yang, *Nat. Commun.* 4 (2013) 1894-1901.
- [S8] J. Ji, L.L. Zhang, H. Ji, Y. Li, X. Zhao, X. Bai, X. Fan, F. Zhang, R.S. Ruoff, *ACS Nano* 7 (2013) 6237-6243.
- [S9] R.R. Salunkhe, B.P. Bastakoti, C.T. Hsu, N. Suzuki, J.H. Kim, S.X. Dou, C.C.

Hu, Y. Yamauchi, *Chem. Eur. J.* 20 (2014) 3084-3090.  
[S10] Q. Qu, P. Zhang, B. Wang, Y. Chen, S. Tian, Y. Wu, Y. Holze, *J. Phys. Chem. C* 113 (2009) 14020-14027.
